# Supplementary figures and images for: Identification of HPV16 E1 and E2-specific T cells in the oropharyngeal cancer tumor microenvironment
Source: HighWire-hosted journal article supplement (doi:10.1136/jitc-2023-006721), 2023-03-01

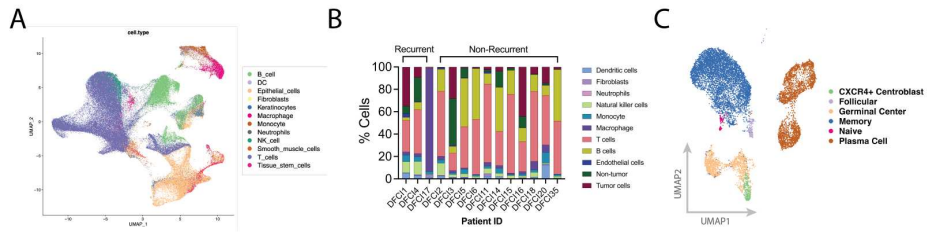

Supplement: jitc-2023-006721supp001_data_supplement.pdf [file jitc-2023-006721supp001_data_supplement.pdf]
